# Supplementary material for: Hierarchical control of coherent gene clusters defines the molecular mechanisms of glioblastoma
Source: Royal Society of Chemistry journal article supplement (doi:10.1039/c5mb00007f), 2015-02-04
Supplement: c5mb00007f1.pdf [file c5mb00007f1.pdf]

Electronic supplementary information - figure captions

### Supplementary Figures Legends

**Fig. S1.** Connectivity hierarchies of GBM1 (**A**) and GBM2 (**B**) hierarchical TR/TF-CGMs networks. The top in the hierarchical pyramid of connectivity is (i) and the lower level is (vi). (**A**) The top regulator TGF $\beta$  controls all 11 CGMs of GBM1. The density of connections is maximal for CGMs 1–5 and 7–8 at the levels 2 (ii) and 3 (iii) of GBM1. The CGMs 9 and 11 are involved in regulation of the levels 4 (iv) and 5 (v). (**B**) In GBM2 the CGMs 1, 3, and 4 have the most significant number of TF/TRs connections at the levels 2 (ii) and 3 (iii). CGMs 1–6 have a majority of the regulation connections on the levels 4 and 5.

**Fig. S2.** TGF $\beta$  controls coherent-gene modules (CGMs) of primary glioblastoma (GBM1). Each of statistically-significant CGMs represented as a heat map of its gene functions. Color represents *p*-value, and the size—number of genes involved in the function.

**Fig. S3.** JUN and TGF $\beta$  control coherent-gene modules (CGMs) of secondary glioblastoma (GBM2). Each of statistically-significant CGMs represented as a heat map of its gene functions. Color represents *p*-value, and the size—number of genes involved in the function.

**Fig. S4.** Correlation of survival by network-associated genes in SurExpress dataset. Kaplan-Meier plots depict survival analyses in patients with specific gene abnormalities. The X-axis denotes period (in months) while Y-axis indicates probability of survival (in percent). High expression in red and low expression is in green. The inset denotes gene expression (Y-axis) in both high-risk (red) and low-risk (green) patient groups for different genes (X-axis). **A.** MAPK8, **B.** SRC, **C.** CCL2, and **D.** MAPK14 expression levels (but not TGFB1, TP53, CTNNB1, FOS, MYC, JUN, RPS27A, MAPK1) were significantly related with patient survival.

**Fig. S5.** Correlation of survival and disease-free status by network associated genes in cBioPortal dataset. Kaplan-Meier plots depict survival analyses in patients with specific gene abnormalities. The X-axis denotes period (in months) while Y-axis indicates probability of survival (in percent). For each gene, GBM patients were classified as the up-regulated (red), no alternation (blue) and down-regulated (green), based on gene expression levels. **A.**, **C.**, **E.**, and **G.** depict overall survival in patients with abnormal expression of MAPK8, CCL2, SRC, and MAPK14 respectively. Similarly, **B.**, **D.**, **F.**, and **H.** depict progression (disease)-free survival in patients with altered expression levels of MAPK8, CCL2, SRC, and MAPK14 respectively.

**Fig. S6. Correlation of molecular subtypes by the selected top level network associated genes in TCGA dataset with overall (sets “i”) and progression free (sets “ii”) survival. A.** TGFB1, **B.** MAPK8, **C.** TP53, **D.** CTNNB1, **E.** SRC, **G.** MYC **in the 4 TCGA subtypes** of GBM. The figures show **Kaplan-Meier plots of survival** in GBM patients with different **expression levels of abovementioned genes in all 4 GBM subtypes: [C] –classical, [P] – proneural, [M] – mesenchymal, [N] - neural.** If we depict the most significant changes in survival we can note that: TGFB higher expression level in the tumor correlates with the decrease of survival in *N* and *P* subtypes and with the increase of survival in *M* subtype (Fig. S6A). MAPK8 higher expression level in the tumor correlates with the decrease of survival in *N* subtype and with the increase of survival in *P* subtype (Fig. S6B). TP53 higher expression level in the tumor correlates with the increase of survival in *M* and *P* subtypes and with the decrease of survival in *N* subtype (Fig. S6C). CTNNB1 higher expression level in the tumor correlates with the increase of survival in *N*, *M*, and *P* subtypes (Fig. 6D). SRC higher expression level in the tumor correlates with the decrease of survival in *N* subtype (Fig. S6E). MYC higher expression level in the tumor correlates with the decrease of survival in *N* subtype and with the increase of survival in *P* subtype (Fig. S6F).
